# Supplementary material for: Prognostic 4-lncRNA-based risk model predicts survival time of patients with head and neck squamous cell carcinoma
Source: PubMed Central journal article supplement — Oncol Lett. 2019 Jul 26;18(3):3304–16. doi: 10.3892/ol.2019.10670 (PMC6704293; doi:10.3892/ol.2019.10670), 2019-07-26

Figure S1. ROC analysis for comparison of the three lncRNA predictive models was performed. The AUC of ROCs indicated the 4-lncRNA model (0.718) from the present study was better than those in the other studies (3-lncRNA signature: 0.664; 5-lncRNA signature: 0.603). ROC, receiver operating curve; lncRNA, long non-coding RNA; AUC, area under the curve.

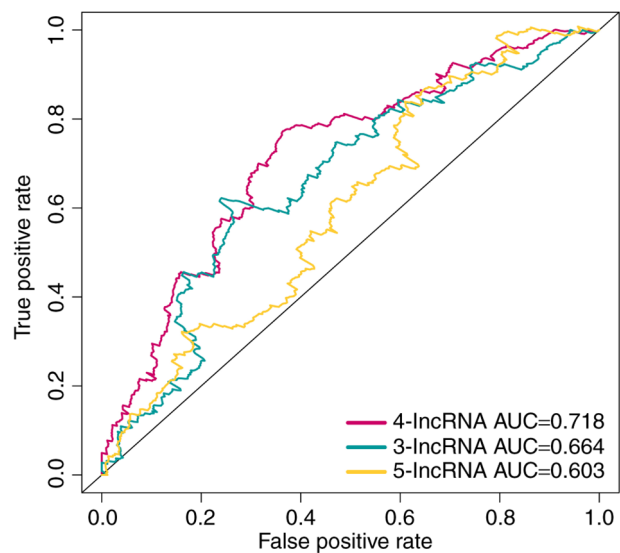

Supplement: Supplementary_Data.pdf [file Supplementary_Data.pdf]
